# Supplementary material for: Cerebrospinal fluid tau, neurogranin, and neurofilament light in Alzheimer's disease
Source: PubMed Central journal article supplement (PMC5048367; doi:10.15252/emmm.201606540), 2016-08-17
Supplement: EMMM-8-1184-s001.pdf [file EMMM-8-1184-s001.pdf]

## Expanded View Figures

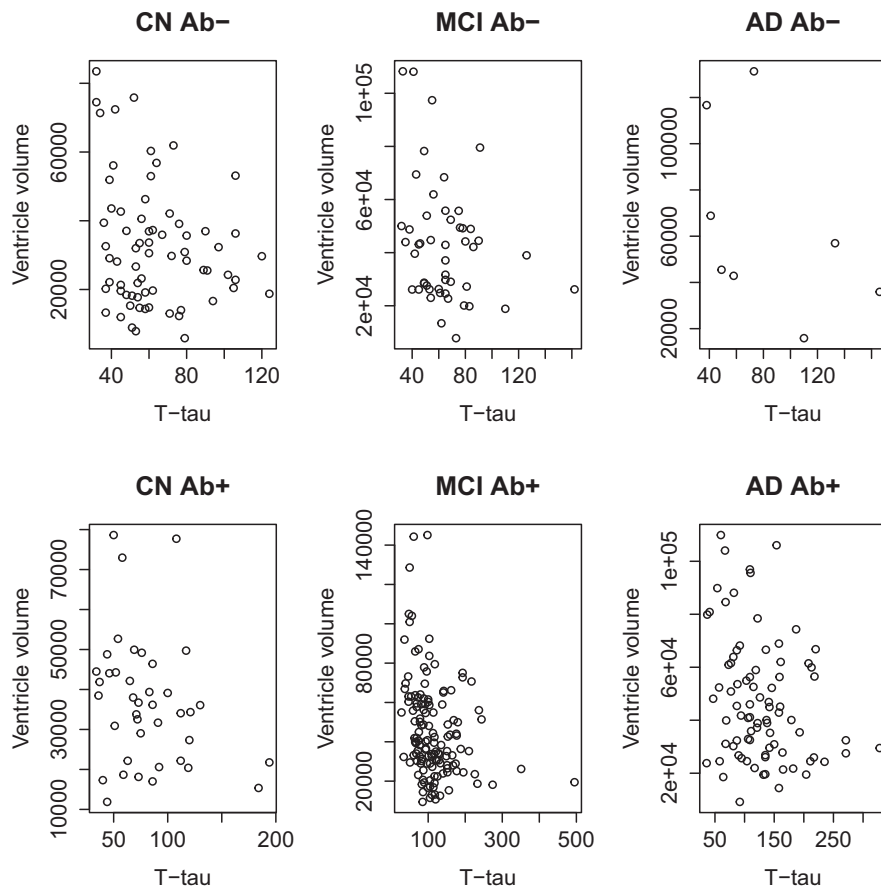

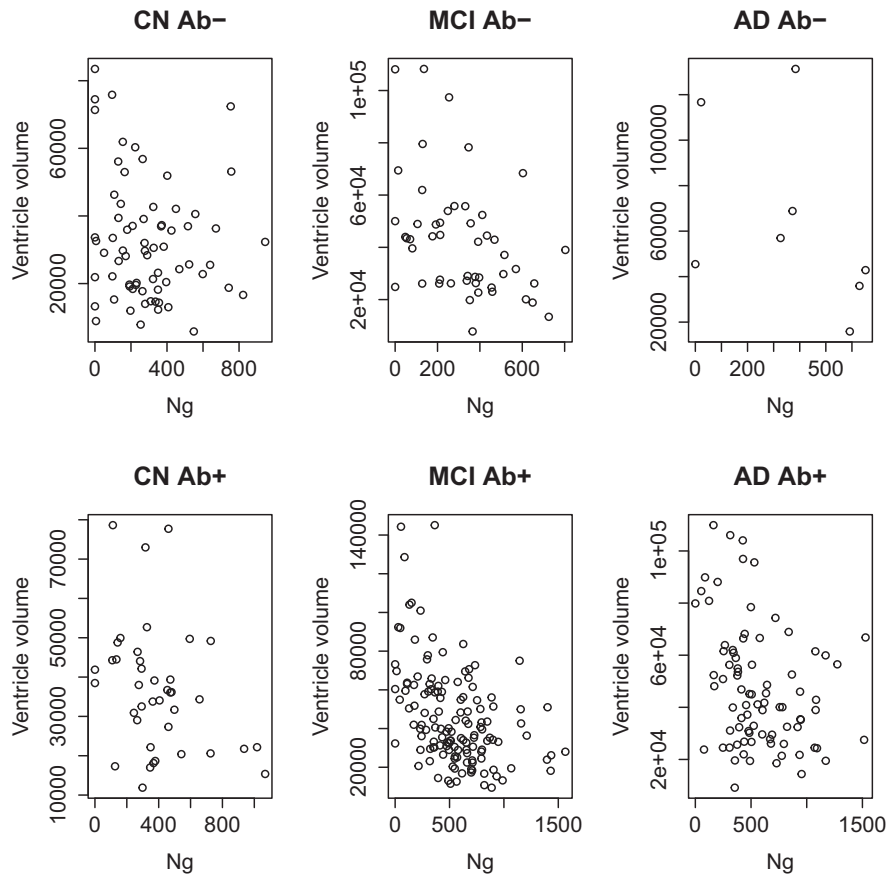

**Figure EV2. CSF Ng and ventricular volume.**  
 Scatter plots showing CSF Ng (ng/l) and ventricular volumes (ml) in different diagnostic group, separately for Aβ-negative (upper row) and Aβ-positive subjects (lower row). The plots illustrate the general observation that very high CSF Ng levels are often seen in subjects with relatively small ventricles, independent of diagnostic group and Aβ status.
